# Supplementary material for: Absorption and Tissue Distribution of Folate Forms in Rats: Indications for Specific Folate Form Supplementation during Pregnancy
Source: MDPI journal article supplement (doi:10.3390/nu14122397), 2022-06-09

## Supplemental data

**Supplemental Table 1:** MS/MS analysis for folate forms.

| Analyte                              | Retention time (min) | MRM transition |          |        |        |         |
|--------------------------------------|----------------------|----------------|----------|--------|--------|---------|
|                                      |                      | Q1 (m/z)       | Q3 (m/z) | DP (V) | CE (V) | CXP (V) |
| 5-MTHF                               | 2.3                  | 460.3          | 313.0    | 110    | 23     | 15      |
| Folic Acid                           | 2.6                  | 442            | 295.2    | 90     | 19     | 10      |
| THF                                  | 2.3                  | 446.3          | 299.0    | 130    | 23     | 15      |
| Formyl-THF                           | 2.5                  | 474            | 327.0    | 120    | 24     | 15      |
| <sup>13</sup> C <sub>5</sub> -5-MTHF | 2.3                  | 465.2          | 313.2    | 125    | 24     | 15      |
| C13-FA                               | 2.6                  | 447.3          | 295.1    | 76     | 24     | 15      |
| C13-Formyl-THF                       | 2.5                  | 475.2          | 328.1    | 60     | 26     | 8       |

Curtain gas = 20 psi, GS 1 and GS 2 = 50 psi, CAD gas = 3.5 x 10e-5 Torr.

v = volts

m/z = mass-to-charge ratio

CAD = collision-activated dissociation

psi = pound per square inch

Q1; Q3 = quadrupole 1 and 3

DP= declustering potential

CE = collision energy

CXP = collision cell exit potential

MRM transition = multiple reaction monitoring

**Figure S1:** Standard curve for measuring methylfolate in tissues.

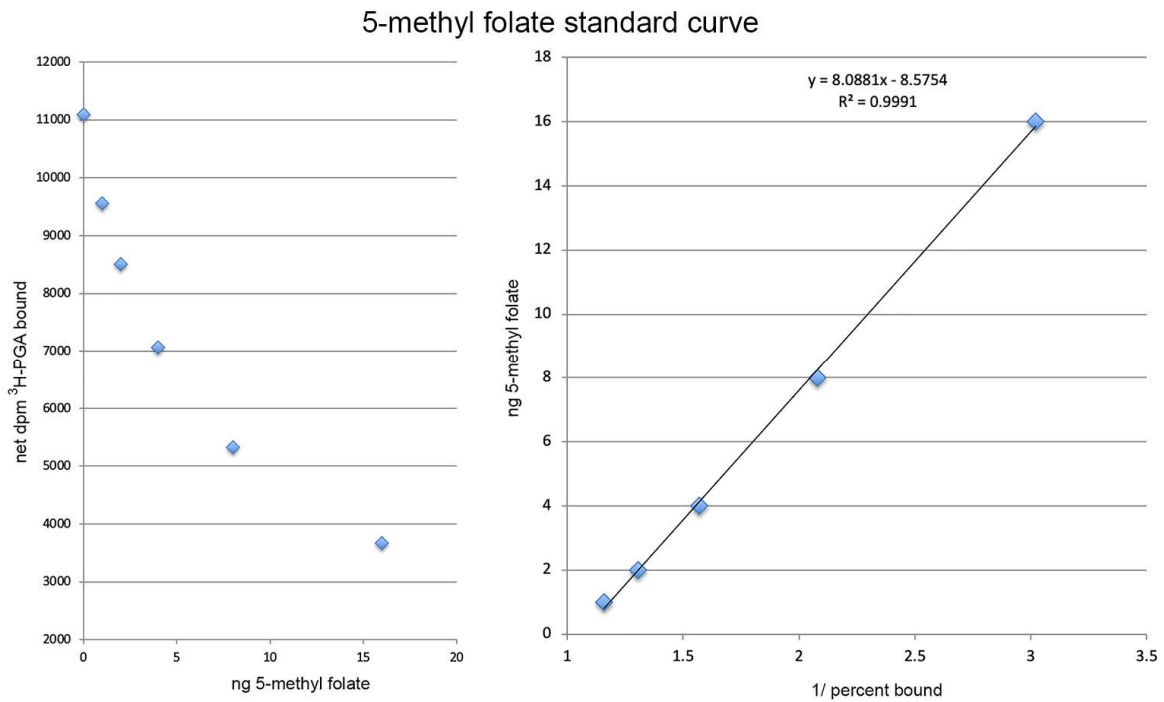

**Figure S2:** Specificity of staining for folate receptor antibody in the fetal brain following IP injection of normal rabbit IgG (left panel) or an equivalent amount of rabbit IgG containing anti rat folate receptor IgG (right panel). Negative staining in the left panel indicates clearance of normal rabbit IgG whereas specific staining for folate receptor antibody can be seen in the choroid plexus.

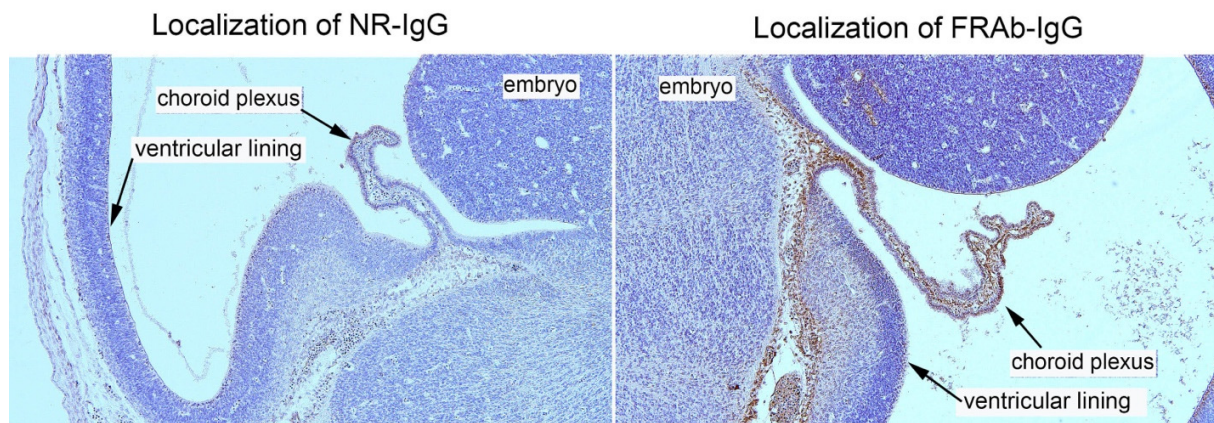

Supplement: s1 [file s1]
